# Supplementary material for: Characterization of a Novel N4-Methylcytosine Restriction-Modification System in Deinococcus radiodurans
Source: MDPI journal article supplement (doi:10.3390/ijms25031660), 2024-01-29
Supplement: s1 [file s1]

**Supplementary Table S1.** Strains and plasmids used in this study.

| Strain and plasmid         | Relevant feature                                                                                                                                    | Reference or source                |
|----------------------------|-----------------------------------------------------------------------------------------------------------------------------------------------------|------------------------------------|
| <b>Strains</b>             |                                                                                                                                                     |                                    |
| <i>D.radiodurans</i>       |                                                                                                                                                     |                                    |
| <i>D. radiodurans</i> R1   | wild-type strain                                                                                                                                    | ATCC13939                          |
| $\Delta M.DraR1$           | R1 but <i>M.DraR1::Str</i>                                                                                                                          | Li, S. J. <i>et al.</i>            |
| $\Delta R.DraR1$           | R1 but <i>R.DraR1::kana</i>                                                                                                                         | This study                         |
| $\Delta R+\Delta M$        | R1 but <i>M.DraR1::Str</i> and <i>R.DraR1::kana</i>                                                                                                 | This study                         |
| <i>E. coli</i>             |                                                                                                                                                     |                                    |
| DH(5 $\alpha$ )            | supE44, $\Delta lacU169$ ( $\phi 80lacZ\Delta M15$ ), hsdR17, recA1, endA1, gyrA96, thi-1, relA1                                                    | TransGen Biotech, Beijing, China   |
| ER2566                     | sulA11 $\Delta(mcrC-mrr)114::IS10$ R(mcr-73::miniTn10-TetS)2 R(zgb-210::Tn10)(TetS) endA1 [dcm]                                                     | ZonHon Biopharma, Jiangshu, China. |
| ER2796                     | fhuA2 $\Delta(lacZ)r1$ glnV44 trp-31 dcm-6 his-1 zed-501::Tn10 argG6 rpsL104 dam-16::Kan xyl-7 mtl-2 metR1 mcr-62 $\Delta(mcrB-hsd-mrr)114$         | Prof. Richard J. Roberts, NEB.     |
| <b>Plasmid</b>             |                                                                                                                                                     |                                    |
| pUC19                      | <i>E. Coli</i> vector                                                                                                                               | TransGen Biotech, Beijing, China   |
| pRADK                      | <i>E. coli-D. radiodurans</i> shuttle vector, confers ampicillin resistance in <i>E. coli</i> and chloromycetin resistance in <i>D. radiodurans</i> | Laboratory stock                   |
| pRADKm                     | Modified pRADK vector contains one 'CCGCGG' site                                                                                                    | Li, S. J. <i>et al.</i>            |
| M. pRADKm                  | Methylated pRADKm vector with M.DraR1 enzyme                                                                                                        | Li, S. J. <i>et al.</i>            |
| pUC19-pDr-Chl (NS)         | A strong promoter pDr and $\Delta CrtB$ fragment was inserted into BamHI and HindIII restriction sites                                              | This study                         |
| pUC19-pDr-CCGC GG-Chl (S)  | NS with an additional CCGCGG site just after the start codon                                                                                        | This study                         |
| pET28a-sumo                | pET28 plasmid modified with a sumo tag and a Ulp1 protease site                                                                                     | Laboratory stock                   |
| pET28a-sumo-R.DraR1        | pET28-sumo ligated with <i>R.DraR1</i>                                                                                                              | This study                         |
| pUC19-pGroES-LacI-pDr-tetR | pGroES-LacI-pDr-tetR fragment was inserted into BamHI and HindIII restriction sites                                                                 | This study                         |
| pRADKIS                    | Modified pRADK vector, pGroES-LacI was inserted into HindIII and XhoI, and pGroES was replaced by pSpac                                             | This study                         |
| pRADKIS-LacZ               | LacZ was inserted into NdeI and BamHI                                                                                                               | This study                         |
| pRADKIS-R.DraR1            | <i>R.DraR1</i> was inserted into NdeI and BamHI                                                                                                     | This study                         |

**Supplementary Table S2.** Primers or oligonucleotides used in this study.

| Primers for PCR amplification and sequencing | Sequence (5'→3')                                                 |
|----------------------------------------------|------------------------------------------------------------------|
| R.DraR1_P1                                   | TTTCCTGTGGTGGACTGGTTTG                                           |
| R.DraR1_P2_K                                 | GACGCGTCTGCAGAAGCTTgctgacaacaccagatgggg                          |
| K_F_P2                                       | cccatctggtgtgtgcagcAAGCTTCTGCAGACGCGTC                           |
| R.DraR1_P3_K                                 | TTTCATTTGATGCTCGATGAGTTTTTCTAGGccttccaagtctgtgagcg               |
| K_R_P3                                       | cgctcacagacttgaagccTAGAAAACTCATCGAGCATCAAATGAAA                  |
| R.DraR1_P4                                   | CATCAACTTTCTGGTGCTTGGAG                                          |
| R.DraR1_P5                                   | ctacggctacctcttagcatgg                                           |
| R.DraR1_P6                                   | ggcaactgctaggcgctta                                              |
| M.DraR1-P1                                   | CACCCCCGTCCAGACTCAGC                                             |
| M.DraR1-P4                                   | GTGCCCATCTGGAGTCGCTACC                                           |
| M.DraR1-P5                                   | GTGAACTGGATTGCGGGATT                                             |
| M.DraR1-P6                                   | TTCCGCAGGTAGTGATAGTTGTTC                                         |
| CrtB_P1                                      | GGGCTTGGTCTGGTCGG                                                |
| CrtB_R_P2_pDrChl                             | TCGTGGTGGCCTTTGACGGCCTGCTTACAGAAAAGGAAAGACA                      |
| pDrChl_F_P2_CrtB                             | TGTCTTTCCTTTTCTGTAAGCAGGCCGTCAAAGGCCACCACGA                      |
| CrtB_F_P3_ChI                                | CAGGGCGGGGCGTAATCTGTACCCCTCCGGG                                  |
| ChI_R_P3_CrtB                                | CCCGGAGGGGTGACAGATTACGCCCCGCCCTG                                 |
| CrtB_P4                                      | TGCCGGGTAGATTGCCG                                                |
| pDrChl_R_CCGCGG                              | ACGGTGGTATATCCAGTGATTTTTTCTCccgaggCATTTAGCTTCCTTAGCTCCTGAAAATCT  |
| ChI_F_CCGCGG                                 | AGATTTTCAGGAGCTAAGGAAGCTAAAATGccgaggGAGAAAAAATCACTGGATATAACCACGT |
| pDRChl_F_SOE                                 | TGTCTTTCCTTTTCTGTAAGCAGGC                                        |
| pDRChl_R_SOE                                 | CCCGGAGGGGTGACAGA                                                |
| 28a_Sumo_FNde                                | CCGCGCGGCAGCCATATGAGCGATAGCGAAGTTAACCAA                          |
| 28a_C10_F_sumo                               | TCGTGAGCAGATTGGTGGTagaggtgagctggggca                             |
| 28a_Sumo_R_C10                               | tgccccagctcacctctACCACCAATCTGCTCACGA                             |
| 28a_C10_RX                                   | tgggtggtggtgctcgagtcacttctcagatgcttctcaat                        |
| AmyE_F_P1-NEW                                | GAGCAGAACAAGGTGCGTG                                              |
| AmyEUP_FH-pUC19                              | catgattacgccaagcttGAGCAGAACAAGGTGCGTG                            |
| pGroESLacI_P2_FH-AmyEUP                      | GAACGCTAGCATCTCCCCAAGCTTCTGCAGACGCGT                             |
| pGroESLacI_RB-tcR                            | GGGCACCAATAACTGCCTTAAAAAAGGATCCTTACTGCCCCGCTTT                   |
| pGroES_F_P2-AmyEUP                           | ACGCTAGCATCTCCCCCTGGAAGCACGTATTGTCGCC                            |
| pGroES_R-LacI                                | GACATCGTATAACGTTACTGGTTTCACGGGTCCTCCTGTGAGTG                     |

|                         |                                                             |
|-------------------------|-------------------------------------------------------------|
|                         | AGA                                                         |
| LacI_F-pGroES           | TCTCACTCACAGGAGGACCCGTGAAACCAGTAACGTTATACGA<br>TGTC         |
| LacI_R_P3-AmyED<br>own  | GAGCAAGTCAGACTCCTCCTCTCACTGCCCCGCTTTCCAG                    |
| tcR_RB-pGroESLac<br>I   | AAAGCGGGCAGTAAGGATCCTTTTTTTAAGGCAGTTATTGGTGC<br>CC          |
| TcR_F-pDr               | GAGATTTTCAGGAGCTAAGGAAGCTAAAATGAAATCTAACAAT<br>GCGCTCATCGT  |
| pDr_R-TcR               | ACGATGAGCGCATTGTTAGATTTTCATTTTAGCTTCCTTAGCTCCT<br>GAAAATCTC |
| pDr_F_P3-AmyED<br>own   | GGAGCAAGTCAGACTCCTCCTCCGTCAAAGGCCACCAC                      |
| AmyEDown_F_P3           | GTGGTGGCCTTTGACGGAGGAGGAGTCTGACTTGCTCC                      |
| AmyE_R_P4_NEW           | TGGACTTTGGCCTTCAGCG                                         |
| pGroES_RX               | AGCTCGCGAGGCCTCGAGTCACTGCCCCGCTTTCCAG                       |
| pGroES_FH-pSpac         | ctttccgctcttgctgctgtagAAGCTTTGGAAGCACGTATTGTCGCC            |
| pSpac_FH-pGroES         | GGCGACAATACGTGCTTCCAAAGCTTctaacagcacaagagcggaag             |
| pSpac_RBS_RN            | TTGAATATGGCTCATATGTTGTCCTCCTGTaattgtGAGcgctcacaattcc        |
| LacI-pGroES_FX_S<br>OE  | AAGCTCGCGAGGCCTC                                            |
| pSpac_RN_SOE            | TTGAATATGGCTCATATGTTGTCCTCC                                 |
| LacZ_FN-pRADIS          | ACAGGAGGACAACATatgcacggttacgatgcgc                          |
| LacZ_RB-pRADIS          | GCAGGTCTGAATCGGATCCttatTTTTgacaccagaccaactggtaatg           |
| pRADIS_C10_FN           | ACAGGAGGACAACATATGagaggtgagctggggca                         |
| pRADIS_C10_RB           | GCAGGTCTGAATCGGATCCtacttctcagatgcttctcaatcg                 |
| <b>Oligonucleotides</b> |                                                             |
| S30_1_F                 | AGACCCACGCCAtCGCGGTGGAGATTACGT                              |
| S30_1_R                 | ACGTAATCTCCACCGCGaTGGCGTGGGTCT                              |
| S30_2_F                 | AGACCCACGCCACtCGCGGTGGAGATTACGT                             |
| S30_2_R                 | ACGTAATCTCCACCGCaGTGGCGTGGGTCT                              |
| S30_3_F                 | AGACCCACGCCACcCGGTGGAGATTACGT                               |
| S30_3_R                 | ACGTAATCTCCACCGaGGTGGCGTGGGTCT                              |
| S30_4_F                 | AGACCCACGCCACCGtGGTGGAGATTACGT                              |
| S30_4_R                 | ACGTAATCTCCACCacGGTGGCGTGGGTCT                              |
| S30_5_F                 | AGACCCACGCCACCGCtGTGGAGATTACGT                              |
| S30_5_R                 | ACGTAATCTCCACaGCGGTGGCGTGGGTCT                              |
| S30_6_F                 | AGACCCACGCCACCGCGtTGGAGATTACGT                              |
| S30_6_R                 | ACGTAATCTCCAaCGCGGTGGCGTGGGTCT                              |
| S30_F_3'FAM             | AGACCCACGCCACCGCGGTGGAGATTACGT*(3'FAM)                      |
| S30_R                   | ACGTAATCTCCACCGCGGTGGCGTGGGTCT                              |
| S30_NS_F                | AGACCCACGCCATATATATGGAGATTACGT                              |
| S30_NS_R                | ACGTAATCTCCATATATATGGCGTGGGTCT                              |

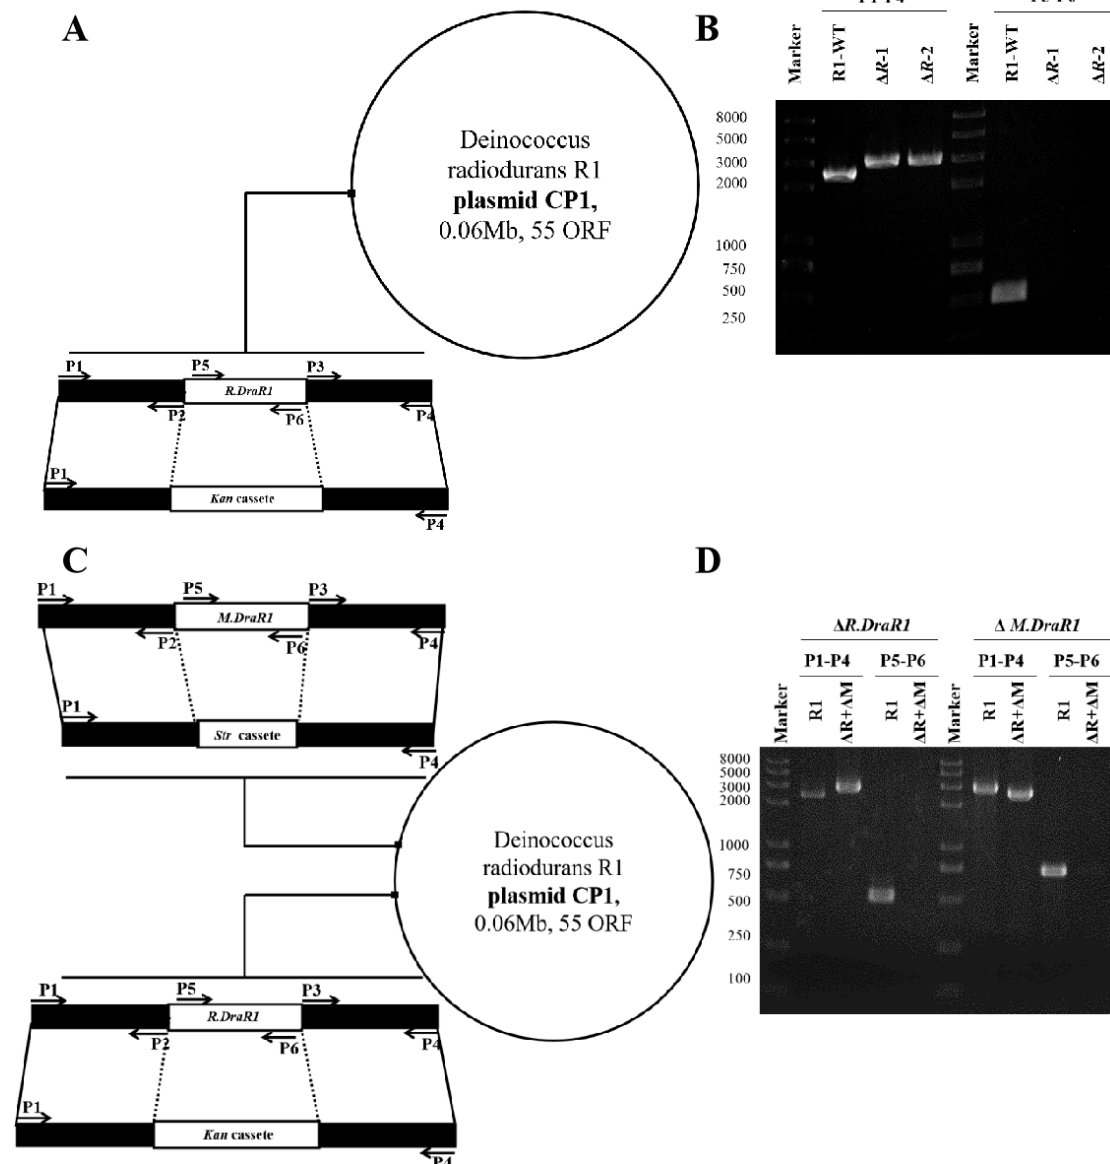

**Supplementary Figure S1. Deletion of *R.DraR1* and double deletion of *R.DraR1* and *M.DraR1* gene in *Deinococcus radiodurans* strain.** (A,C) Scheme of gene mutation by homologous recombination which replaced *R.DraR1* with kanamycin and *M.DraR1* with streptomycin resistant fragment. (B) PCR analysis to confirm the mutation of *R.DraR1* strain.  $\Delta R-1$  and  $\Delta R-2$  are 2 clones of mutant. The amplicon from  $\Delta R.DraR1$  (P1-P4, 3010 bp) is longer than WT (P1-P4, 2628 bp), and no products to corresponding to the size of the inner fragment from WT (P5-P6, 558 bp) in  $\Delta R.DraR1$ , suggesting *R.DraR1* was completely replaced. (D) PCR analysis to confirm the double mutation of *R.DraR1* and *M.DraR1* strain. The amplicon from  $\Delta M.DraR1$  (P1-P4, 2648 bp) is slightly shorter than WT (P1-P4, 3062 bp), and no products to corresponding to the size of the inner fragment from WT ( $\Delta R.DraR1$  P5-P6, 558 bp;  $\Delta M.DraR1$  P5-P6, 706 bp), suggesting 2 genes were completely replaced.

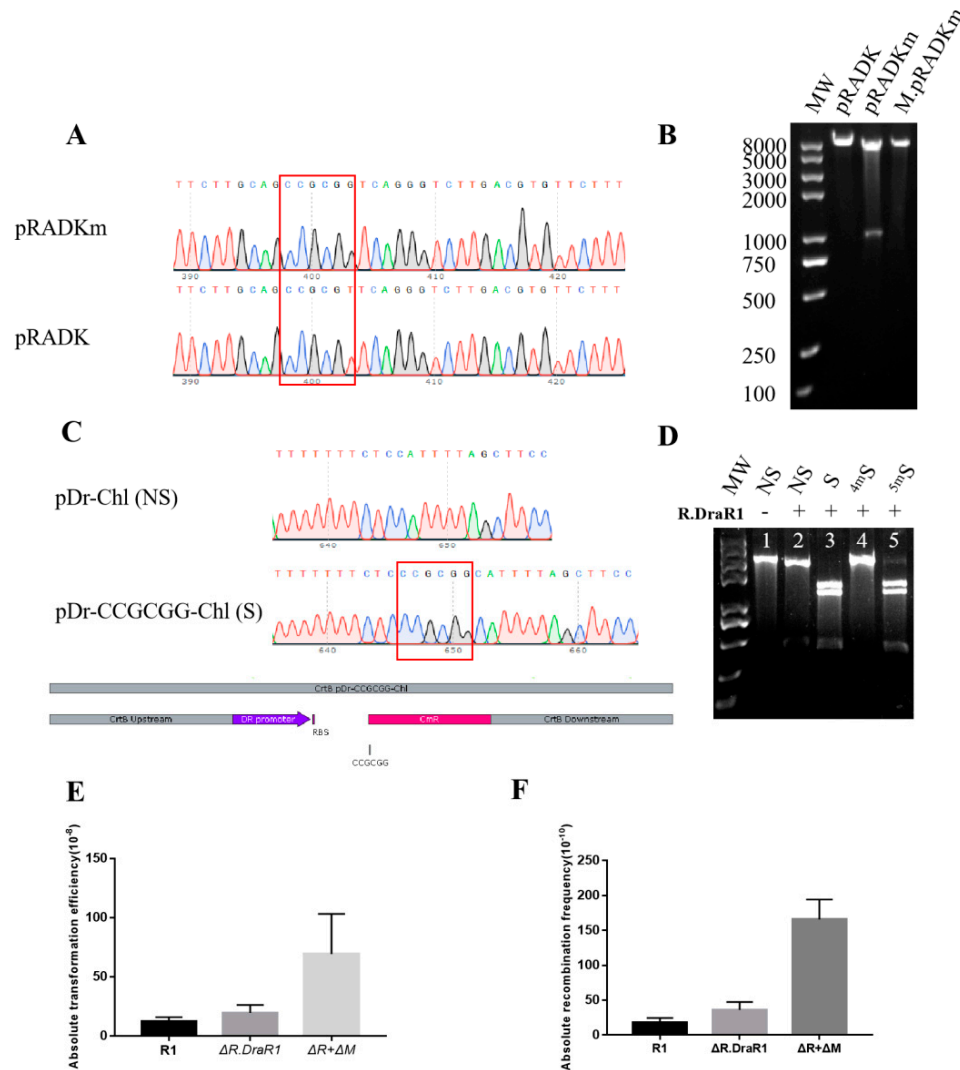

**Supplementary Figure S2. Sequencing and methylation and restriction assays to confirm the methylation status in CCGCGG sites.** (A) Confirmation of the mutation of T to G to acquire one CCGCGG site for the construction of pRADKm through PCR. pRADK has no CCGCGG site. (B) Confirmation of methylation status of different plasmids. Plasmids were generated using the methylation-deficient *E. coli* ER2796 cells. Acquisition of M.pRADKm follows protection Assays protocol, which involves reacting M.DraR1 under buffer 1 conditions at 30°C for 2 hours, followed by reagent recovery and purification using the kit. The fact that pRADKm can be digested by R.DraR1 but pRADK and M.pRADKm cannot, indicates that all CCGCGG sites in M.pRADKm are methylated. (C) Confirmation of the addition of the CCGCGG Sequence. NS represents fragments that have 1 site, while Each of S fragments have 2 sites. Confirmation of methylation status of different fragments. All fragments were inserted into the pUC19 plasmid and transformed into ER2796. The NS fragment itself contains a CCGCGG site upstream of chloramycetin coding region, which can be cleaved by R.DraR1 (lane 2). The unmethylated S fragment can be cleaved by R.DraR1 (lane 3), while the cleavage activity is inhibited by 4mC M.DraR1 (lane 4), but not by 5mC M.SssI (lane 5). (E) The absolute transformation efficiency of R1,  $\Delta R.DraR1$  and  $\Delta R+\Delta M$ . (F) The absolute recombination efficiency of R1,  $\Delta R.DraR1$  and  $\Delta R+\Delta M$ .

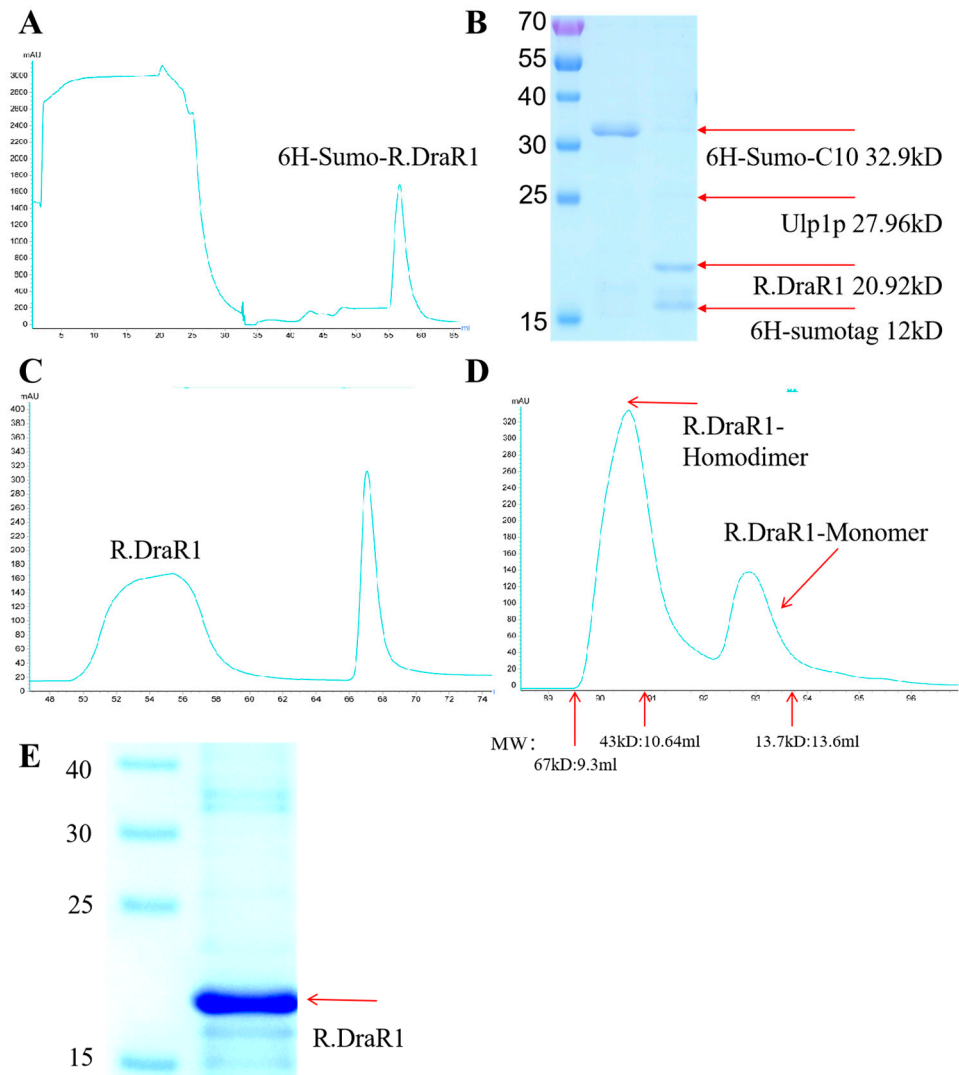

**Supplementary Figure S3. Purification and identification of R.DraR1 enzyme.** (A) Diagrams of protein purification by HisTrap. The fused 6His-Sumo-R.DraR1 protein was eluted with 500 mM imidazole. (B) SDS-PAGE was used to show that the fusion protein was cleaved by Sumotag protease Ulp1p. (C) Diagrams of protein purification by HisTrap. After Ulp1 protease cleaved overnight at 4 °C, The protein was desalted and loaded onto HisTrap again, the flow-through fractions were collected. (D) Gel-filtration analysis revealed that R.DraR1 exist as a homodimer in solution. FPLC system coupled to a Superdex 75 10/300 GL column. The First peak was collected, R.DraR1 was concentrated to 20  $\mu$ M, and stored at -20 °C. (E) SDS-PAGE was used to show the fractions collected in (D). The purity of R.DraR1 protein is calculated to be > 90% using ImageJ software. ImageJ software is commonly employed for grayscale analysis to quantify protein purity. To quantify the gel image, it is imported into ImageJ, and the "Analyze > Gels > Select First Lane" command is utilized to designate the lane of interest. Subsequently, the "Analyze > Gels > Plot Lane" command is employed to conduct grayscale quantification. After obtaining the grayscale signal value through grayscale analysis, protein purity was determined by calculating the ratio of the intensity of the target protein band to the total intensity of the lane.

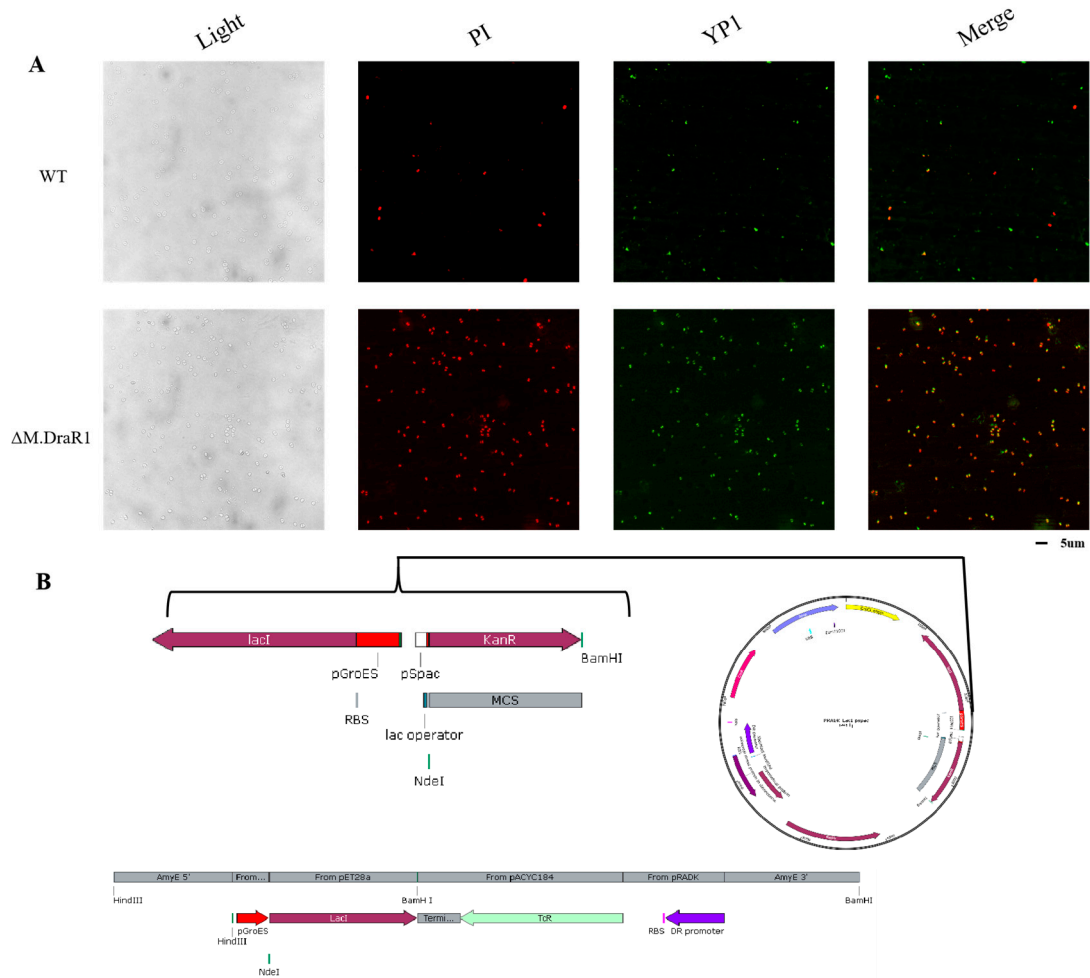

**Supplementary Figure S4. Cell Morphology of *D. radiodurans* and construction of IPTG-LacI in *D. radiodurans*.** (A) Cell Morphology of *D. radiodurans*. Apoptotic cells are labeled with a green stain, necrotic cells with a red stain, and dead cells with both colors. (B) Construction of IPTG-induced plasmid pRADKIS and the pGroES-LacI-pDr-tetR fragment. The fragment is used for inserting it into the AmyE locus and introducing LacI into the genome of *D. radiodurans*. Briefly, first we recombine the pGroES-LacI-pDr-tetR fragment into the *D. radiodurans* AmyE locus and select using tetracycline. Then, we transform the IPTG-induced plasmid pRADKIS into the knockout strain and select using chloromycetin to confirm successful construction.
